# Supplementary material for: Mechanism of pyocyanin abolishment caused by mvaT mvaU double knockout in Pseudomonas aeruginosa PAO1
Source: PubMed Central journal article supplement (PMC6961724; doi:10.1080/21505594.2019.1708052), 2019-12-28
Supplement: kvir-11-01-1708052-s001.pdf [file kvir-11-01-1708052-s001.pdf]

## Supplemental materials

Table S1 Strains and plasmids used in this study

| Strain or plasmid            | Relevant characteristics                                          | Reference |
|------------------------------|-------------------------------------------------------------------|-----------|
| <i>P. aeruginosa</i> strains |                                                                   |           |
| PAO1                         | Wild type                                                         | ATCC      |
| PAO1-Sm                      | Spontaneous Sm <sup>r</sup> mutant of PAO1                        | (1)       |
| PAO1ΔT                       | <i>mvaT</i> ::Gmr mutant of PAO1                                  | (2)       |
| PAO1ΔU                       | <i>mvaU</i> ::Tetr mutant of PAO1                                 | (2)       |
| PAO1ΔTΔU                     | <i>mvaT</i> ::Gmr <i>mvaU</i> ::Tetr mutant of PAO1               | (2)       |
| PAO1-pUCPT                   | Carrying complementation plasmid for <i>mvaT</i> gene             | (2)       |
| PAO1-pUCPU                   | Carrying complementation plasmid for <i>mvaU</i> gene             | (2)       |
| ΔT- pUCPT                    | Carrying complementation plasmid for <i>mvaT</i> gene             | (2)       |
| ΔT-pUCPU                     | Carrying complementation plasmid for <i>mvaU</i> gene             | (2)       |
| ΔU- pUCPT                    | Carrying complementation plasmid for <i>mvaT</i> gene             | (2)       |
| ΔU- pUCPU                    | Carrying complementation plasmid for <i>mvaU</i> gene             | (2)       |
| ΔTΔU-pUCPT                   | Carrying complementation plasmid for <i>mvaT</i> gene             | (2)       |
| ΔTΔU-- pUCPU                 | Carrying complementation plasmid for <i>mvaU</i> gene             | (2)       |
| Plasmids                     |                                                                   |           |
| pUCP 18                      | <i>E. coli</i> - <i>P. aeruginosa</i> shuttle vector              | (3)       |
| pUCP-T                       | Complementation plasmid for <i>mvaT</i> gene, derived from pUCP18 | (2)       |
| pUCP-U                       | Complementation plasmid for <i>mvaU</i> gene, derived from pUCP18 | (2)       |

Table S2 Primers used in this study

| Gene name                                                 | Type | Oligonucleotide sequence (5'-3')  | Source or reference |
|-----------------------------------------------------------|------|-----------------------------------|---------------------|
| Primers for knockout of <i>mvaT</i> and <i>mvaU</i> genes |      |                                   |                     |
| up <i>mvaT</i>                                            | Fw   | CATAAGCTTCGCGGGCGATCGGGGCGA AAG   | (2)                 |
|                                                           | Rev  | ATCGAATTCTTGTCTGTGCTGAGTGGCGGT    |                     |
| down <i>mvaT</i>                                          | Fw   | ATCGAATTCACGAAGAACGCCAGCCCAGTG    | (2)                 |
|                                                           | Rev  | CATGGATCCGATGTCCGCGCCACCATTGCC    |                     |
| up <i>mvaU</i>                                            | Fw   | CCCAAGCTTCAAGGCGATCTTCAAGCCGATCTA | (2)                 |
|                                                           | Rev  | CGGAATTCTTCGTTTCACTCCCGTTCTAAAAA  |                     |

---

|                                                                         |     |                                   |            |
|-------------------------------------------------------------------------|-----|-----------------------------------|------------|
| down <i>mvaU</i>                                                        | Fw  | CGGAATTCAGCCGGTTTTCCCGACGGCATCCT  | (2)        |
|                                                                         | Rev | CGGGATCCCCGCCATTGTTCGCATTCGCGCAGC |            |
| Primers for detection of <i>mvaT</i> and <i>mvaU</i> genes              |     |                                   |            |
| <i>mvaT</i>                                                             | Fw  | CATGGATCCAGCACAGACAAGGTACCTGAC    | (2)        |
| <i>mvaT</i>                                                             | Rev | ATCGGATCCTTAGCCGAGCAGGGTGGCCCA    |            |
| <i>mvaU</i>                                                             | Fw  | GGATCCTTTAGAACGGGAGTGAAACGAATG    | (2)        |
| <i>mvaU</i>                                                             | Rev | GGATCCTTAGCGTTGCAGCCAGGATTCGAC    |            |
| Primers for construction of <i>lacZ</i> transcriptional fusion plasmids |     |                                   |            |
| up <i>phzA1</i>                                                         | Fw  | CATGCCATGGCCTGTTCCAGAGCCTTT       | This study |
|                                                                         | Rev | CGGGATCCAGAGGGCTCTCCAGGTAT        |            |
| up <i>phzA2</i>                                                         | Fw  | CATGCCATGGCATCGGCCTGCTCAACTGAAT   | This study |
|                                                                         | Rev | CGGGATCCTGCGAATCTCCGCCAGTTCGAAT   |            |
| up <i>phzH</i>                                                          | Fw  | CATGCCATGGTCGAACGTTGCCACGAAATC    | This study |
|                                                                         | Rev | CGGGATCCAGGGAAACTCCTATAATTG       |            |
| up <i>phzM</i>                                                          | Fw  | CATGCCATGGTCATCCCGGGTTTCTTT       | This study |
|                                                                         | Rev | CGGGATCCCTTTTATTCTCTCTCGTTAC      |            |
| up <i>phzS</i>                                                          | Fw  | CATGCCATGGTACCAGACCCACCCGATGT     | This study |
|                                                                         | Rev | CGGGATCCGGGTGCTTCCTTTTCTCGAGT     |            |
| up <i>rhlR</i>                                                          | Fw  | CATGCCATGGTGCAGTAAGCCCTGATCGAT    | This study |
|                                                                         | Rev | CGGGATCCACGGTGCTGGCATAACAGATA     |            |
| up <i>lasR</i>                                                          | Fw  | CATGCCATGGCCGAACTGGAAAAGTGGCTAT   | This study |
|                                                                         | Rev | CGGGATCCAGCGCTACGTTCTTCTTAAAC     |            |
| up <i>pqsR</i>                                                          | Fw  | CATGCCATGGCCCTTATTCTTTTATTGGG     | This study |
|                                                                         | Rev | CGGGATCCCAAGGCCGCGGATTCTAAC       |            |
| Primers for Real-Time PCR                                               |     |                                   |            |
| <i>oprL</i>                                                             | Fw  | CCAACAGCGGTGCCGTTGA               |            |
|                                                                         | Rev | GCCATATTGTACTCGCGGGT              |            |
| <i>phzA1</i>                                                            | Fw  | AACGGTCAGCGGTACAGGGAAAC           | This study |
|                                                                         | Rev | ACGAACAGGCTGTGCCGCTGTAAC          |            |
| <i>phzA2</i>                                                            | Fw  | CTGTAACCGTTCGGCCCCCTTCATG         | This study |
|                                                                         | Rev | ATGCGAGAGTACCAACGGTTGAAAG         |            |
| <i>phzH</i>                                                             | Fw  | GCTCATCGACAATGCCGAACT             | This study |
|                                                                         | Rev | GCGGATCTCGCCGAACATCAG             |            |
| <i>phzM</i>                                                             | Fw  | AGCAACCTGGCATTCCACGAG             | This study |

|             |     |                           |            |
|-------------|-----|---------------------------|------------|
|             | Rev | TGCAGGATGGCCTTGGTCAATT    |            |
| <i>phzS</i> | Fw  | CCGAAGGCAAGTCGCTGGTGA     | This study |
|             | Rev | GGTCCCAGTCGGCGAAGAACG     |            |
| <i>lasI</i> | Fw  | ATGATCGTACAAATTGGTCGGCGCG | This study |
|             | Rev | CGCTCCTTGAACACTTGAG       |            |
| <i>lasR</i> | Fw  | CTGTGGATGCTCAAGGACTAC     | (4)        |
|             | Rev | AACTGGTCTTGCCGATGG        |            |
| <i>rhlI</i> | Fw  | CGGCATCAGGTCTTCATCG       | (4)        |
|             | Rev | GTAGCGGGTTTGCGGATG        |            |
| <i>rhlR</i> | Fw  | CGGTCTGCCTGAGCCATC        | (4)        |
|             | Rev | GCCAGCGTCTTGTTCCG         |            |
| <i>pqsA</i> | Fw  | GACCGGCTGTATTCGATTC       | (4)        |
|             | Rev | GCTGAACCAGGGAAAGAAC       |            |
| <i>pqsR</i> | Fw  | ATCGACGAGGAACTGAAGA       | (4)        |
|             | Rev | CTGATCTGCCGGTAATTGG       |            |
| <i>pqsH</i> | Fw  | GCGCGGATCGAGTTCATC        | (5)        |
|             | Rev | CAGGGCGATTCCCCTGA         |            |
| <i>pqsE</i> | Fw  | GGATGCCGAATTGGTTTG        | This study |
|             | Rev | GGTCGTAGTGCTTGTGGG        |            |
| <i>qsrO</i> | Fw  | ATGCTTACGTTTTGGGCTAT      | This study |
|             | Rev | ATGGAAATGGATTCTTTTGAGTT   |            |

Fig S1

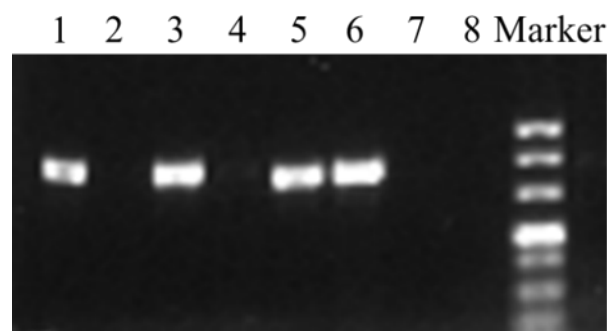

**Fig S1 Agarose gel electrophoresis of *mvaT* and *mvaU* PCR products in PAO1 and the relevant knockout mutants. 1-4: Detection of *mvaT* gene, 5-8: Detection of *mvaU* gene. 1. PAO1, 2. PAO1 $\Delta$ T, 3. PAO1 $\Delta$ U, 4. PAO1 $\Delta$ T $\Delta$ U, 5. PAO1, 6. PAO1 $\Delta$ T, 7.**

PAO1 $\Delta$ U, 8. PAO1 $\Delta$ T $\Delta$ U. Marker: DL500 (500 bp, 400 bp, 300 bp, 200 bp, 150 bp, 100 bp, 50 bp).

Fig S2

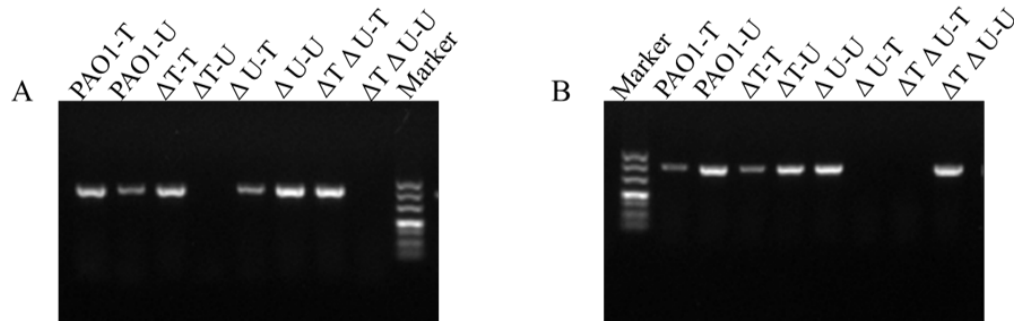

**Fig S2 Agarose gel electrophoresis of *mvaT* and *mvaU* PCR products in PAO1 and the knockout mutants after plasmid complementation.** A: Agarose gel electrophoresis images of *mvaT*. B: Agarose gel electrophoresis images of *mvaU*. Marker: 500 bp, 400 bp, 300 bp, 200 bp, 150 bp, 100 bp, 50 bp.

Fig S3

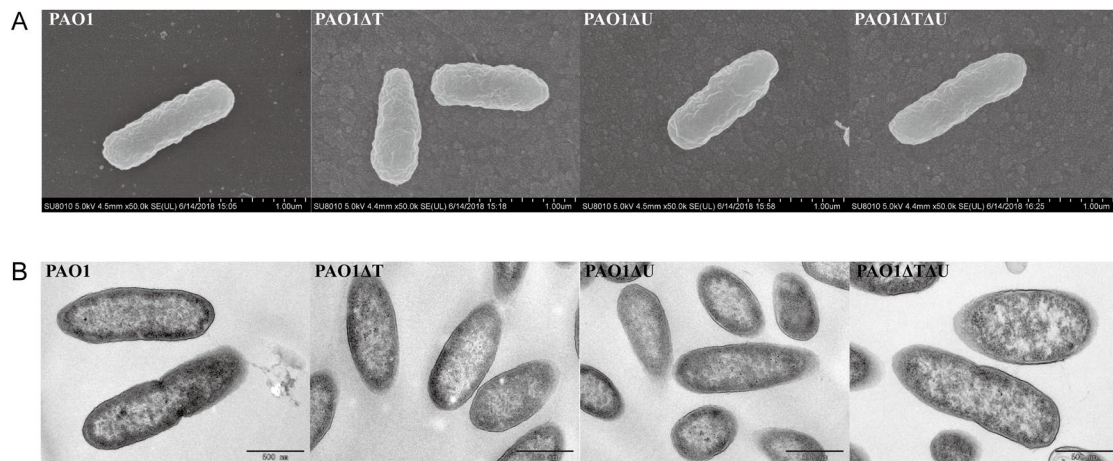

**Fig S3 Images from SEM (A) and TEM (B) for PAO1 wild type and the *mvaT mvaU* knockout mutants.** 1 mL of overnight cultures were centrifuged at 6000 $\times$ g for 3 min and supernatants were discarded. Bacterial pellets were resuspended and washed in 1 mL 2.5% glutaraldehyde in phosphate-buffered saline (PBS). Tubes were fixed overnight at 4 $^{\circ}$ C and fixatives were removed by centrifuged again at 6000 $\times$ g for 3 min.

SEM was conducted by using a scanning electron microscope (FEI Quanta 2000), and TEM was conducted by using a transmission electron microscope (JEOL JEM-1200EX).

Fig S4

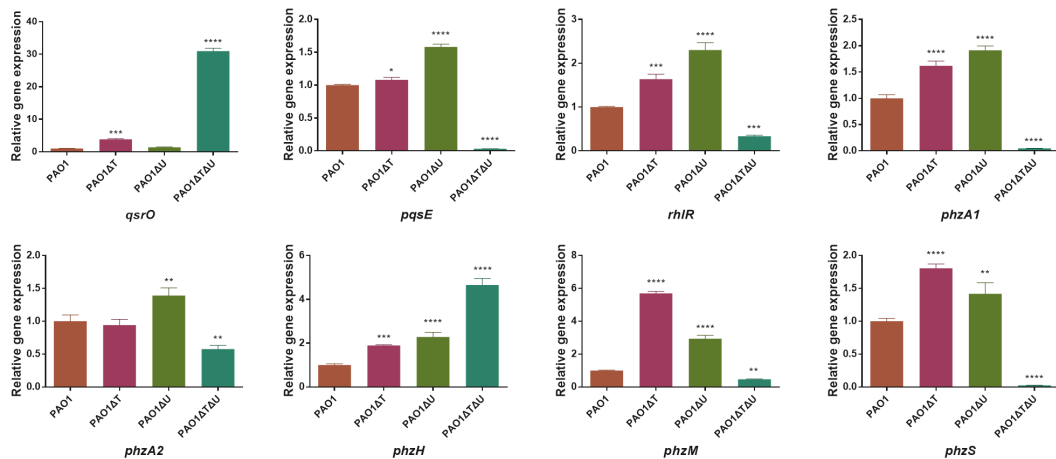

**Fig S4. Effect of *mvaT mvaU* knockout mutation on representative gene expression in early stationary phase detected by Real -Time PCR.** Data was calculated with one-way ANOVA and Bonferroni's multiple comparisons, in comparison with *P. aeruginosa* PAO1, \* $P < 0.05$ , \*\* $P < 0.01$ , \*\*\* $P < 0.001$ , \*\*\*\* $P < 0.0001$ .

Reference

1. Itoh Y. 1997. Cloning and characterization of the *aru* genes encoding enzymes of the catabolic arginine succinyltransferase pathway in *Pseudomonas aeruginosa*. *J Bacteriol* 179:7280-90.
2. Li C, Wally H, Miller SJ, Lu CD. 2009. The multifaceted proteins MvaT and MvaU, members of the H-NS family, control arginine metabolism, pyocyanin synthesis, and prophage activation in *Pseudomonas aeruginosa* PAO1. *J Bacteriol* 191:6211-8.
3. Schweizer HP. 1991. *Escherichia-Pseudomonas* shuttle vectors derived from

pUC18/19. Gene 97:109-21.

4. El-Mowafy SA, Abd El Galil KH, El-Messery SM, Shaaban MI. 2014. Aspirin is an efficient inhibitor of quorum sensing, virulence and toxins in *Pseudomonas aeruginosa*. *Microb Pathog* 74:25-32.
5. Viducic D, Murakami K, Amoh T, Ono T, Miyake Y. 2016. RpoN Modulates Carbapenem Tolerance in *Pseudomonas aeruginosa* through *Pseudomonas* Quinolone Signal and PqsE. *Antimicrob Agents Chemother* 60:5752-64.
